# Supplementary material for: Pyrocatalytic oxidation – strong size-dependent poling effect on catalytic activity of pyroelectric BaTiO3 nano- and microparticles
Source: Royal Society of Chemistry journal article supplement (doi:10.1039/d0cp03158e), 2020-01-01
Supplement: d0cp03158e1.pdf [file d0cp03158e1.pdf]

## Supplementary Information

# Pyrocatalytic Oxidation - Strong Size-Dependent Poling Effect on Catalytic Activity of Pyroelectric BaTiO<sub>3</sub> Nano- and Microparticles

*Sascha Raufeisen,<sup>a,b</sup> Peter Neumeister,<sup>c</sup> Johannes R. Buchheim,<sup>a,b</sup> Michael Stelter,<sup>a,b,d</sup> and Patrick Braeutigam<sup>a,b,\*</sup>*

<sup>a</sup>Institute of Technical Chemistry and Environmental Chemistry, Friedrich Schiller University  
Jena, Philosophenweg 7a, 07743 Jena, Germany

<sup>b</sup>Center for Energy and Environmental Chemistry (CEEC Jena), Friedrich Schiller University  
Jena, Philosophenweg 7a, 07743 Jena, Germany

<sup>c</sup>Fraunhofer IKTS, Fraunhofer Institute for Ceramic Technologies and Systems,  
Winterbergstraße 28, 01277 Dresden, Germany

<sup>d</sup>Fraunhofer IKTS, Fraunhofer Institute for Ceramic Technologies and Systems, Michael-  
Faraday-Straße 1, 07629 Hermsdorf, Germany

### Corresponding Author

\*E-mail: patrick.braeutigam@uni-jena.de. Phone: +49 3641 948458. fax: +49 3641 948402.

**Scheme S.1:** Pyrocatalytic oxidation of non-fluorescent 2',7'-dichlorodihydrofluorescein (DCHF) to fluorescent 2',7'-dichlorofluorescein (DCF).

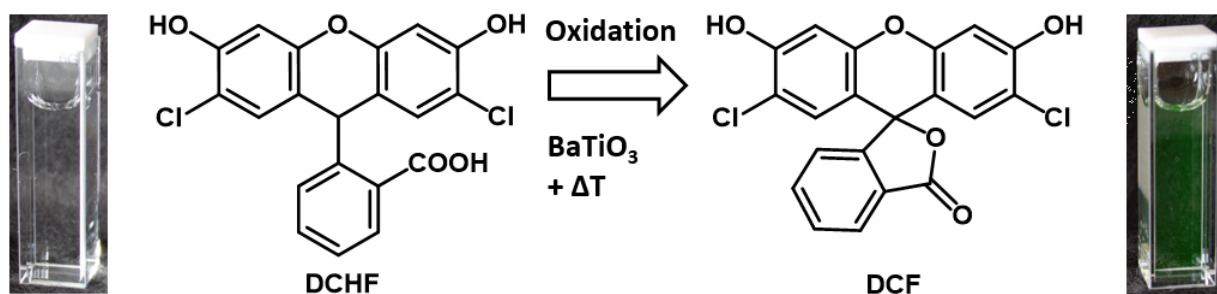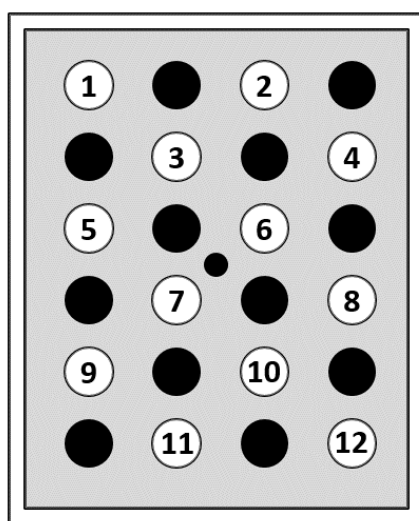

**Figure S.1.** Schematic sketch of the aluminium block of the thermomixer with 24 slots. In a typical experiment, up to 12 micro tubes were placed in every second slot (numbered slots).

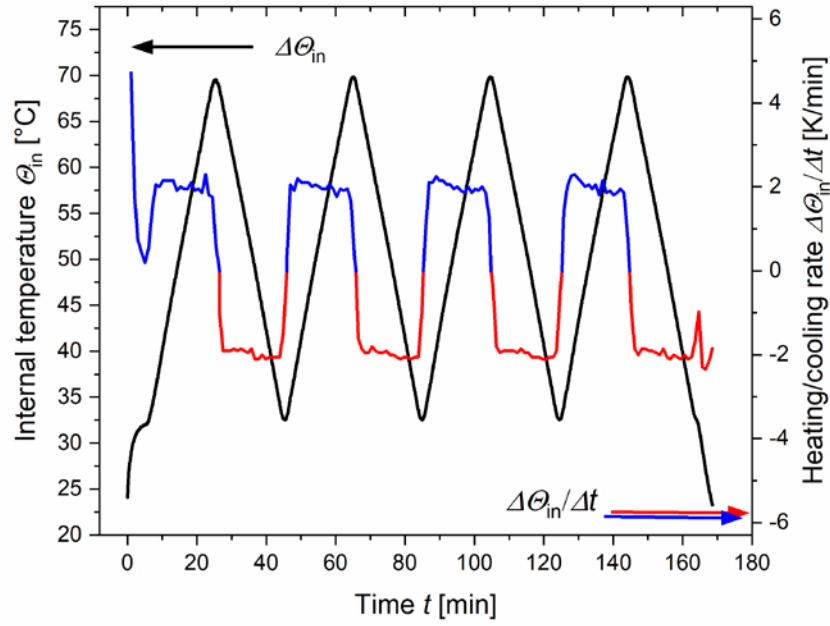

**Figure S.2.** Measured temperature inside the reaction vessel  $\Theta_{in}$  over time  $t$  and corresponding heating/cooling rate  $\Delta\Theta_{in}/\Delta t$  for the whole temperature program used in the DCHF-oxidation experiments. It consists of a 5 min equilibration phase at 32.5 °C followed by four full cycles and a 5 min cooling phase back to the starting temperature.

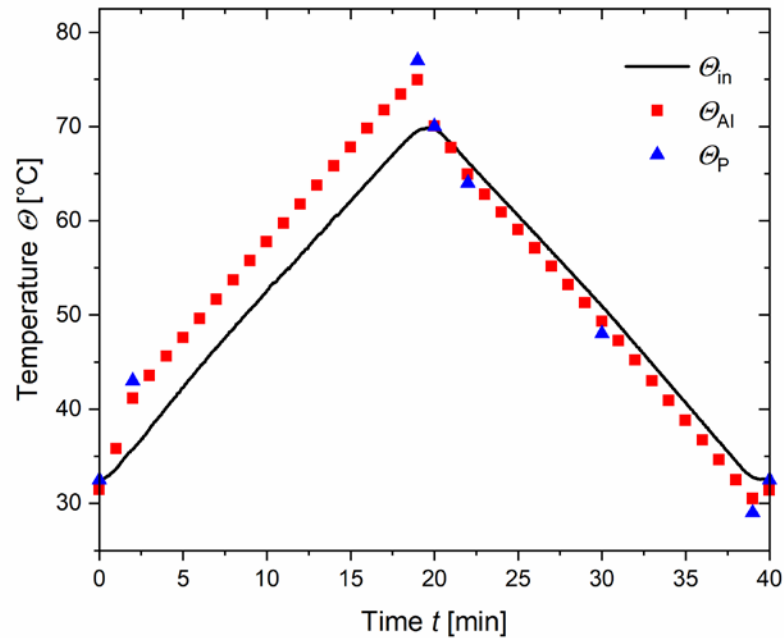

**Figure S.3.** Measured temperature inside the reaction vessel  $\Theta_{in}$ , of the aluminium block of the thermoshaker  $\Theta_{Al}$  and the preset temperature  $\Theta_P$  over time  $t$  for one temperature cycle used in the DCHF-oxidation experiments.

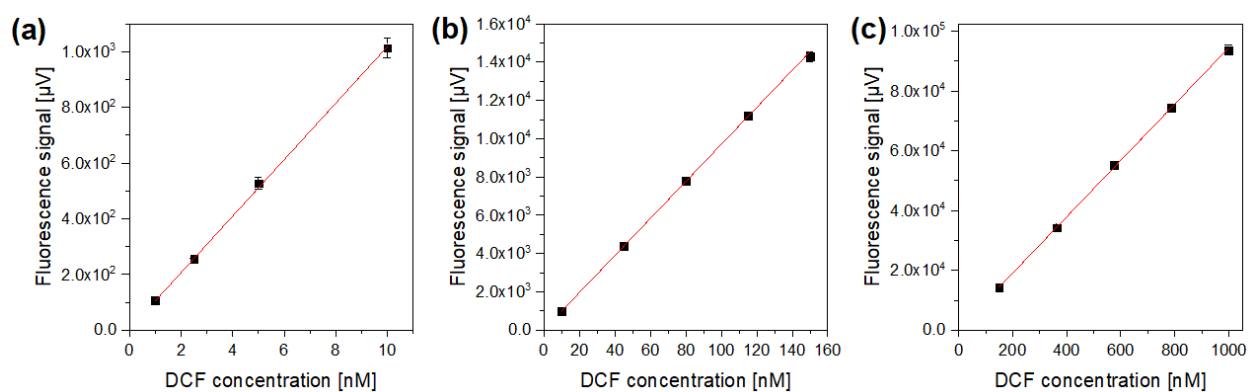

**Figure S.4.** Results and linear regression of external calibration of DCF with fluorescence spectroscopy in three concentration ranges: (a) 1 – 10 nM, (b) 10 – 150 nM, (c) 150 – 1000 nM.

**Table S.1.** Calibration parameters of the linear regression for the quantification of DCF via fluorescence spectroscopy.

| Working range<br>[nM] | $m$ [ $\mu V/nM$ ] | $n$ [ $\mu V$ ] | $LOD$ [nM] | $LOQ$ [nM] |
|-----------------------|--------------------|-----------------|------------|------------|
| 1 - 10                | 100.8              | 10.0            | 0.15       | 0.5        |
| 10 - 150              | 95.3               | 105.4           | 1.19       | 3.6        |
| 150 - 1000            | 93.5               | 622.9           | 5.44       | 16.3       |

$m$ : slope,  $n$ : intercept,  $LOD$ : limit of detection,  $LOQ$ : limit of quantification

**Table S.2.** Crystallographic data of Rietveld refinement for unpoled BT powders.

| Sample              | BT100              |                    | BT200              |                    | BT500              |                    |
|---------------------|--------------------|--------------------|--------------------|--------------------|--------------------|--------------------|
| RWP [%]             | 6.8                |                    | 6.4                |                    | 8.4                |                    |
| goodness of fit     | 2.45               |                    | 2.20               |                    | 3.22               |                    |
| compounds           | BaTiO <sub>3</sub> |
| crystal system      | cubic              | tetragonal         | cubic              | tetragonal         | cubic              | tetragonal         |
| space group         | $Pm\bar{3}m$       | $P4mm$             | $Pm\bar{3}m$       | $P4mm$             | $Pm\bar{3}m$       | $P4mm$             |
| lattice parameters  |                    |                    |                    |                    |                    |                    |
| $a, b$ [Å]          | 4.0133(1)          | 4.0005(1)          | 4.0108(1)          | 3.9969(1)          | 4.0082(1)          | 3.9960(1)          |
| $c$ [Å]             | 4.0133(1)          | 4.0276(1)          | 4.0108(1)          | 4.0359(1)          | 4.0082(1)          | 4.0384(1)          |
| $c/a - 1$ [%]       | -                  | 0.6774             | -                  | 0.9758             | -                  | 1.061              |
| weight fraction [%] | $38.2 \pm 2.4$     | $61.8 \pm 2.4$     | $18.0 \pm 2.2$     | $82.0 \pm 2.2$     | $8.7 \pm 3.3$      | $91.3 \pm 3.3$     |

BTX00: BaTiO<sub>3</sub> powder with X00 nm nominal particle size; RWP: residual weighted profile

**Table S.3.** Crystallographic data of Rietveld refinement for poled BT powders.

| Sample              | BT100              |                    | BT200              |                    | BT500              |                    |
|---------------------|--------------------|--------------------|--------------------|--------------------|--------------------|--------------------|
| RWP [%]             | 6.3                |                    | 7.1                |                    | 7.7                |                    |
| goodness of fit     | 2.37               |                    | 2.59               |                    | 2.91               |                    |
| compounds           | BaTiO <sub>3</sub> |
| crystal system      | cubic              | tetragonal         | cubic              | tetragonal         | cubic              | tetragonal         |
| space group         | $Pm\bar{3}m$       | $P4mm$             | $Pm\bar{3}m$       | $P4mm$             | $Pm\bar{3}m$       | $P4mm$             |
| lattice parameters  |                    |                    |                    |                    |                    |                    |
| $a, b$ [Å]          | 4.0138(1)          | 4.0006(1)          | 4.0111(1)          | 3.9968(1)          | 4.0054(1)          | 3.9950(1)          |
| $c$ [Å]             | 4.0138(1)          | 4.0294(1)          | 4.0111(1)          | 4.0363(1)          | 4.0054(1)          | 4.0374(1)          |
| $c/a - 1$ [%]       | -                  | 0.7199             | -                  | 0.9883             | -                  | 1.061              |
| weight fraction [%] | $33.3 \pm 2.9$     | $66.7 \pm 2.9$     | $18.1 \pm 2.0$     | $81.9 \pm 2.0$     | $8.0 \pm 3.2$      | $92.0 \pm 3.2$     |

BTX00: BaTiO<sub>3</sub> powder with X00 nm nominal particle size; RWP: residual weighted profile

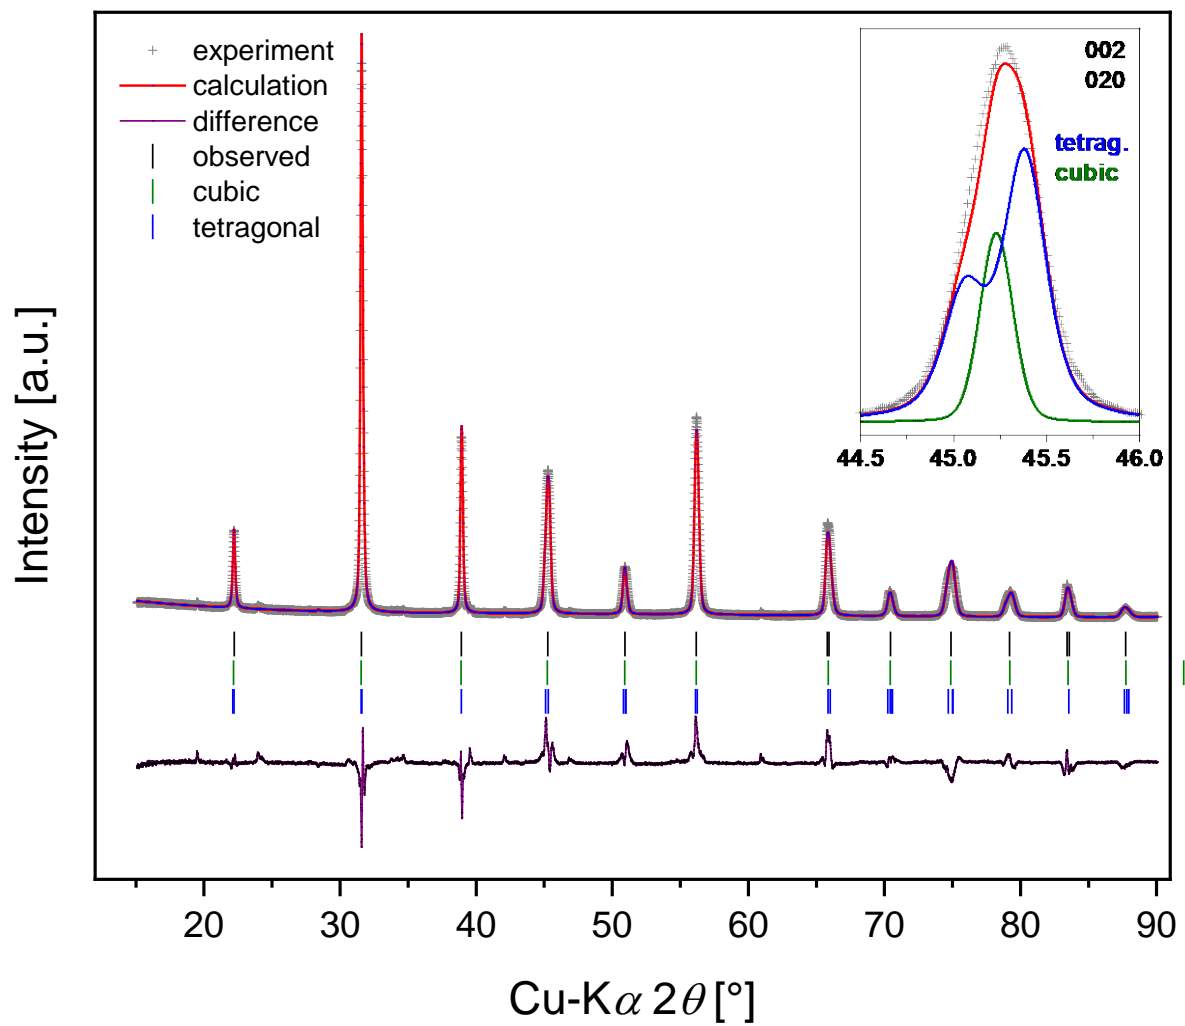

**Figure S.5.** Rietveld refinement results of unpoled BaTiO<sub>3</sub> powder with 100 nm nominal particle diameter (BT100). Inset shows composition of 002/020 reflection with respect to cubic and tetragonal fraction.

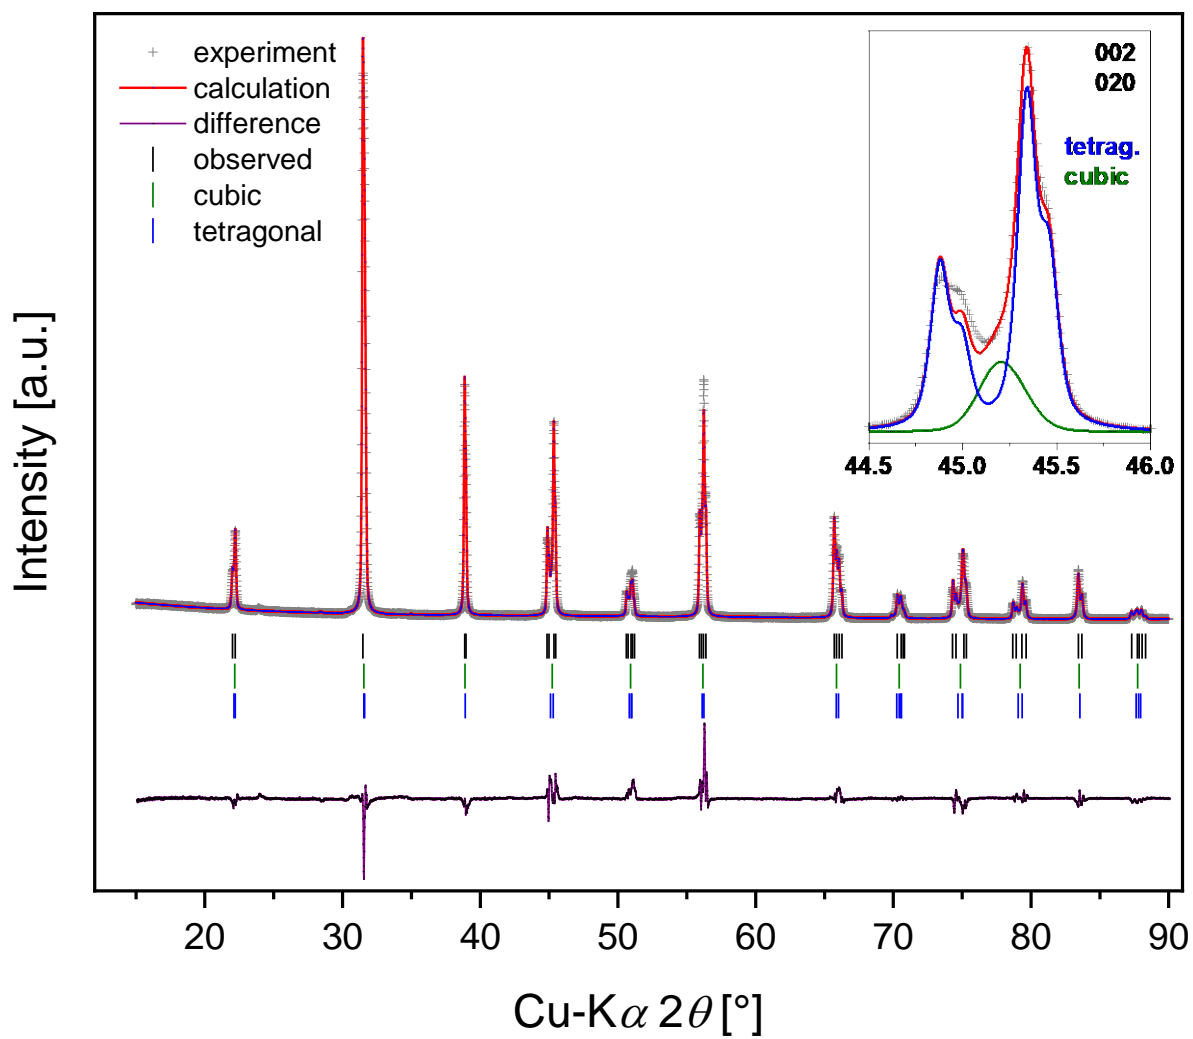

**Figure S.6.** Rietveld refinement results of unpoled BaTiO<sub>3</sub> powder with 200 nm nominal particle diameter (BT200). Inset shows composition of 002/020 reflection with respect to cubic and tetragonal fraction.

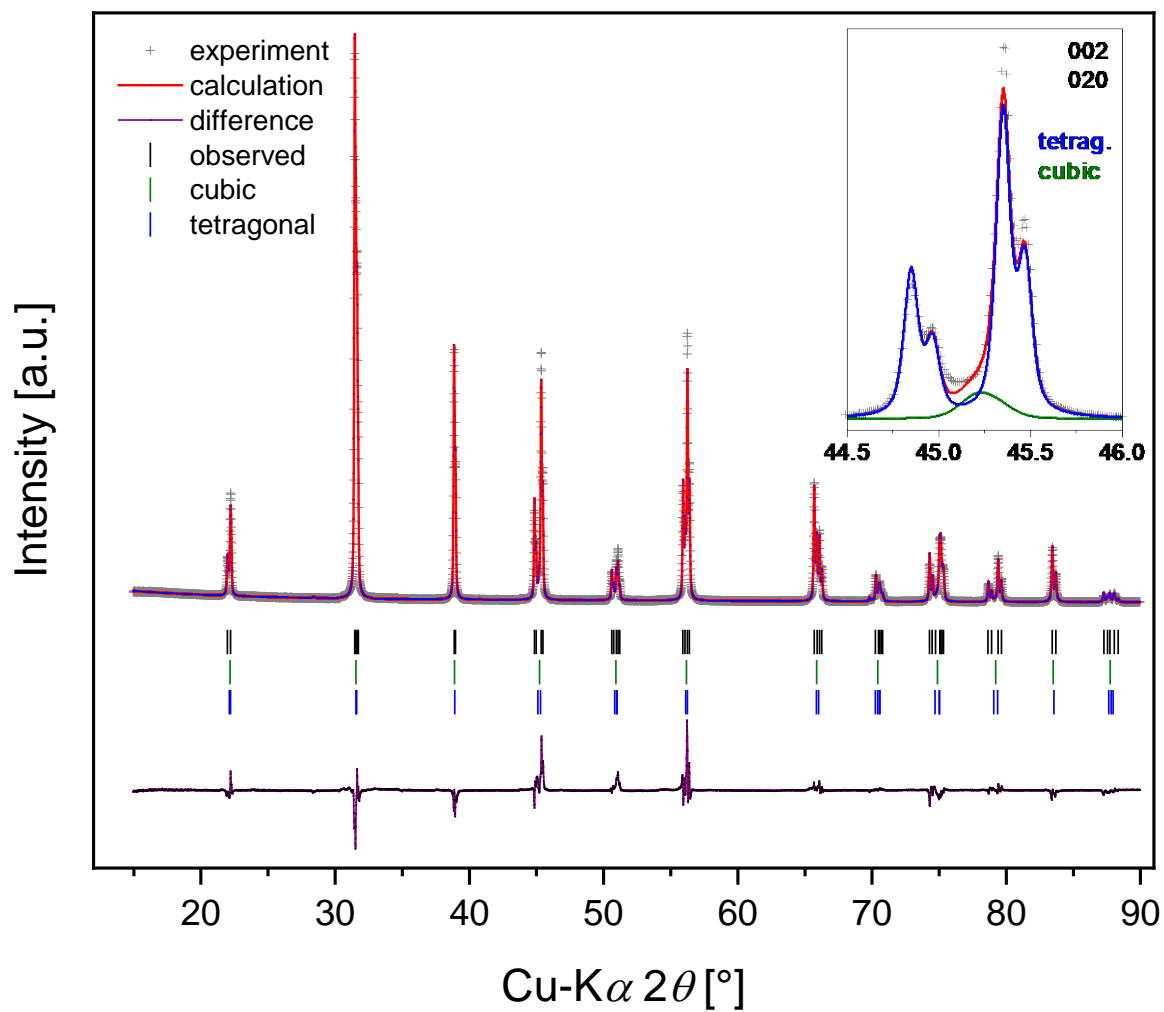

**Figure S.7.** Rietveld refinement results of unpoled BaTiO<sub>3</sub> powder with 500 nm nominal particle diameter (BT500). Inset shows composition of 002/020 reflection with respect to cubic and tetragonal fraction.



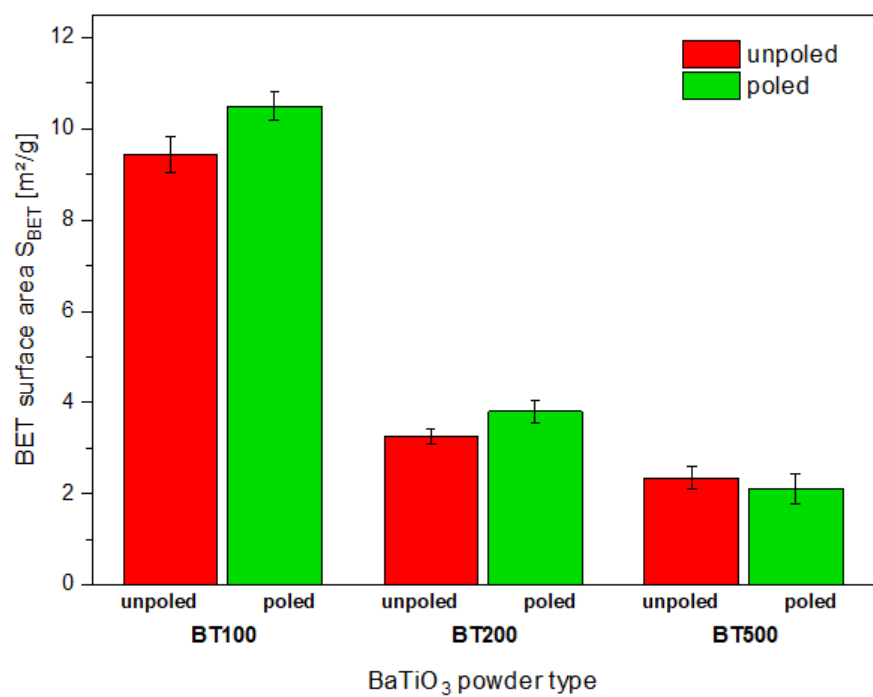

**Figure S.8.** Comparison of the obtained BET specific surface area  $S_{\text{BET}}$  for poled and unpoled BaTiO<sub>3</sub> powders with nominal particle sizes of 100, 200 and 500 nm (BT100, BT200, BT500). BET: Brunauer-Emmett-Teller.
